# Supplementary material for: A survey of personnel and services offered in 32 outpatient US clozapine clinics
Source: Springer Nature journal article supplement (doi:10.1186/s12888-021-03584-6), 2021-11-19
Supplement: MOESM1 [file 19884540]

# Clozapine System Questionnaire

---

1. Name:

2. Profession:

- Psychiatrist
- Other Physician
- Nurse Practitioner
- Other Nurse
- Psychologist
- Social Worker
- Pharmacist
- Other (specify):

 \*

3. Email:

4. Practice location:

5. Type of practice: (choose all settings in which you administer clozapine)

*If you administer clozapine in multiple settings, respond first for your largest clozapine system. If you want to report on multiple settings, you can do the survey more than once.*

- Community mental health clinic
- Academic or university setting
- Private practice
- Partial hospital or intensive outpatient program
- Inpatient or hospital
- Residential facility
- Jail or prison
- Other (specify):

---

6. Approximately how many patients are currently prescribed clozapine by you personally or in systems that you lead?

*If you work in multiple clozapine settings, enter your total across all settings.*

---

**Which functions are your systems currently providing?**

### 7. Lab-related:

- On-site phlebotomy
- Reminders to patients when due for labs
- Outreach to patients when overdue for labs
- Alerts to clinician when patient is overdue for labs
- Use of point-of-care ANC (absolute neutrophil count) testing device
- Other (specify):

 \*

### 8. On-call service for clozapine-related issues:

- After hours
- Weekends
- None provided

### 9. Medical care:

- On-site general medical care and consultation
- Vital sign monitoring
- Other (specify):

 \*

## 10. Delivery of services in group format:

- Psychoeducation
- Physical health screening
- Group prescribing (medication group)
- Other (specify):

\*

## 11. Electronic health record (EHR) related:

- Use of a population health registry for clozapine patients
- Mechanism to identify clozapine-eligible patients within the EHR
- Mechanism to identify patients prescribed clozapine within the EHR
- Clozapine order sets for laboratory monitoring or prescriptions or associated orders
- Clozapine note templates for progress notes or other documentation
- Lab ordering and reporting
- Other (specify):

\*

## 12. Side-effect monitoring:

- Protocol or guidelines for monitoring side effects
- Structured screening questionnaires for monitoring side effects
- Protocols for managing specific side effects
- Other (specify):

\*

### 13. Monitoring treatment response:

Protocol or guidelines for monitoring treatment response

Structured symptom assessment (specify):

 \*

Structured functional assessment (specify):

 \*

### 14. Individual or group interventions to mitigate metabolic side effects:

Nutritionist

Group psychoeducation on health promotion/diet/exercise support

Other (specify):

 \*

### 15. Pharmacy:

On-site pharmacy

Medication delivered to clinic

Medication delivered to patient

Medication pick-up at pharmacy

Other (specify):

 \*

### 16. Telehealth (specify):

17. Case management (specify):

18. Patient education:

Handouts

Curricula

Materials

Website

Other (specify):

 \*

19. Family support and education:

Family liaison

Family meetings

Family education handouts, curricula, materials, web site (specify):

 \*

Other (specify):

 \*

20. Select people who play an active role in the clozapine system:

- Psychiatrist
- Physician (other)
- Psychiatric nurse practitioner
- Nurse (RN, LVN/LPN)
- Medical assistant
- Pharmacist with prescribing privileges
- Pharmacist
- Social worker
- Case manager
- Psychologist
- Administrative assistant
- Peer specialist
- Psychiatry residents
- Medical students or other trainees: specify

 \*

- Other (specify):

 \*

## 21. Who enters clozapine REMS ANC values online?

- Psychiatrist
- Other physician
- Psychiatric nurse practitioner
- Other nurse
- Pharmacist
- Clerical staff
- Point of care ANC testing device
- Other (specify):

\*

**(untitled)**

---

## 22. What's the leadership of your clozapine system?

- Led by physician
- Led by psychiatric nurse practitioner
- Led by other nurse
- Led by pharmacist
- Other (specify):

\*



23. What would you most like to change/include/expand within your current system?

24. What are the main barriers to accomplishing these changes?
